# Supplementary material for: Association between Sleep Duration and Subclinical Thyroid Dysfunction Based on Nationally Representative Data
Source: J Clin Med. 2019 Nov 18;8(11):2010. doi: 10.3390/jcm8112010 (PMC6912782; doi:10.3390/jcm8112010)
Supplement: Supplementary file 1 [file jcm-08-02010-s001.pdf]

## Supplementary Tables

**Table S1. Risk of subclinical thyroid dysfunctions according to sleep duration in evening and nighttime workers**

|                 | Subclinical hyperthyroidism                |                 | Subclinical hypothyroidism                 |                 |
|-----------------|--------------------------------------------|-----------------|--------------------------------------------|-----------------|
|                 | Odds ratio<br>(95% confidence<br>interval) | <i>p</i> -value | Odds ratio<br>(95% confidence<br>interval) | <i>p</i> -value |
| Sleep duration  |                                            |                 |                                            |                 |
| Crude           |                                            |                 |                                            |                 |
| Normal sleepers | reference                                  |                 | reference                                  |                 |
| Short sleepers  | 1.974 (0.821-4.748)                        | 0.1284          | 2.994 (0.657-13.649)                       | 0.1562          |
| Long sleepers   | 2.315 (0.713-7.519)                        | 0.1621          | 1.961 (0.275-13.986)                       | 0.5010          |
| Model 1         |                                            |                 |                                            |                 |
| Normal sleepers | reference                                  |                 | reference                                  |                 |
| Short sleepers  | 2.048 (0.855-4.904)                        | 0.1075          | 2.969 (0.650-13.564)                       | 0.1600          |
| Long sleepers   | 2.005 (0.629-6.389)                        | 0.2388          | 1.984 (0.296-13.286)                       | 0.4796          |
| Model 2         |                                            |                 |                                            |                 |
| Normal sleepers | reference                                  |                 | reference                                  |                 |
| Short sleepers  | 1.995 (0.817-4.875)                        | 0.1293          | 3.655 (0.672-19.871)                       | 0.1333          |
| Long sleepers   | 1.869 (0.617-5.666)                        | 0.2682          | 1.817 (0.328-10.075)                       | 0.4937          |
| Model 3         |                                            |                 |                                            |                 |
| Normal sleepers | reference                                  |                 | reference                                  |                 |
| Short sleepers  | 2.009 (0.799-5.053)                        | 0.1379          | 3.426 (0.634-18.500)                       | 0.1520          |
| Long sleepers   | 1.872 (0.615-5.699)                        | 0.2692          | 1.885 (0.356-9.987)                        | 0.4555          |

Data are presented OR (95% CI).

Statistics were carried out using Logistic regression.

Model 1: adjusted by age and sex

Model 2: adjusted by age, sex, BMI, diabetes, alcohol consumption, household income level, education, and urine iodine creatinine ratio

Model 3: adjusted by age, sex, BMI, diabetes, alcohol consumption, household income level, education, urine iodine creatinine ratio and working pattern

**Table S2. Risk of subclinical thyroid dysfunctions according to sleep duration (5 subgroups)**

|                        | Subclinical hyperthyroidism                |                 | Subclinical hypothyroidism                 |                 |
|------------------------|--------------------------------------------|-----------------|--------------------------------------------|-----------------|
|                        | Odds ratio<br>(95% confidence<br>interval) | <i>p</i> -value | Odds ratio<br>(95% confidence<br>interval) | <i>p</i> -value |
| <b>Sleep duration</b>  |                                            |                 |                                            |                 |
| <b>Crude</b>           |                                            |                 |                                            |                 |
| Extreme short sleepers | 2.375 (1.230-4.585)                        | 0.0101          | 2.424 (1.016-5.784)                        | 0.0460          |
| Mild short sleepers    | 1.352 (1.005-1.818)                        | 0.0466          | 1.159 (0.761-1.766)                        | 0.4919          |
| Normal sleepers        | reference                                  |                 | reference                                  |                 |
| Mild long sleepers     | 1.779 (1.089-2.907)                        | 0.0216          | 1.783 (0.930-3.418)                        | 0.0815          |
| Extreme long sleepers  | 2.021 (0.535-7.630)                        | 0.2985          | 2.122 (0.453-9.954)                        | 0.3392          |
| <b>Model 1</b>         |                                            |                 |                                            |                 |
| Extreme short sleepers | 2.065 (1.051-4.057)                        | 0.0354          | 2.146 (0.863-5.334)                        | 0.1002          |
| Mild short sleepers    | 1.319 (0.979-1.778)                        | 0.0688          | 1.128 (0.740-1.721)                        | 0.5741          |
| Normal sleepers        | reference                                  |                 | reference                                  |                 |
| Mild long sleepers     | 1.758 (1.077-2.872)                        | 0.0242          | 1.785 (0.935-3.409)                        | 0.0789          |
| Extreme long sleepers  | 2.010 (0.523-7.732)                        | 0.3092          | 2.101 (0.445-9.905)                        | 0.3476          |
| <b>Model 2</b>         |                                            |                 |                                            |                 |
| Extreme short sleepers | 2.100 (1.057-4.170)                        | 0.0341          | 2.316 (0.943-5.689)                        | 0.0670          |
| Mild short sleepers    | 1.312 (0.972-1.770)                        | 0.0758          | 1.134 (0.743-1.732)                        | 0.5585          |
| Normal sleepers        | reference                                  |                 | reference                                  |                 |
| Mild long sleepers     | 1.781 (1.094-2.902)                        | 0.0205          | 1.911 (1.001-3.647)                        | 0.0495          |
| Extreme long sleepers  | 2.124 (0.526-8.580)                        | 0.2898          | 2.166 (0.435-10.784)                       | 0.3446          |
| <b>Model 3</b>         |                                            |                 |                                            |                 |
| Extreme short sleepers | 2.121 (1.063-4.229)                        | 0.0329          | 2.315 (0.933-5.744)                        | 0.0702          |
| Mild short sleepers    | 1.289 (0.953-1.743)                        | 0.0999          | 1.087 (0.707-1.672)                        | 0.7040          |
| Normal sleepers        | reference                                  |                 | reference                                  |                 |
| Mild long sleepers     | 1.763 (1.082-2.873)                        | 0.0229          | 1.887 (0.986-3.611)                        | 0.0550          |
| Extreme long sleepers  | 2.159 (0.531-8.784)                        | 0.2819          | 2.212 (0.444-11.013)                       | 0.3318          |

Data are presented OR (95% CI).

Statistics were carried out using Logistic regression.

Model 1: adjusted by age and sex

Model 2: adjusted by age, sex, BMI, diabetes, alcohol consumption, household income level, education, and urine iodine creatinine ratio

Model 3: adjusted by age, sex, BMI, diabetes, alcohol consumption, household income level, education, urine iodine creatinine ratio and working pattern
